## Correction

# Correction: Mangiferin Attenuates Diabetic Nephropathy by Inhibiting Oxidative Stress Mediated Signaling Cascade, TNF $\alpha$ Related and Mitochondrial Dependent Apoptotic Pathways in Streptozotocin-Induced Diabetic Rats

The *PLOS ONE* Staff

There is an error in the legend for Figure 15. Please see the complete, correct Figure 15 and legend here.

---

**Citation:** The *PLOS ONE* Staff (2014) Correction: Mangiferin Attenuates Diabetic Nephropathy by Inhibiting Oxidative Stress Mediated Signaling Cascade, TNF $\alpha$  Related and Mitochondrial Dependent Apoptotic Pathways in Streptozotocin-Induced Diabetic Rats. *PLoS ONE* 9(12): e115364. doi:10.1371/journal.pone.0115364

**Published:** December 3, 2014

**Copyright:** © 2014 The *PLOS ONE* Staff. This is an open-access article distributed under the terms of the Creative Commons Attribution License, which permits unrestricted use, distribution, and reproduction in any medium, provided the original author and source are credited.

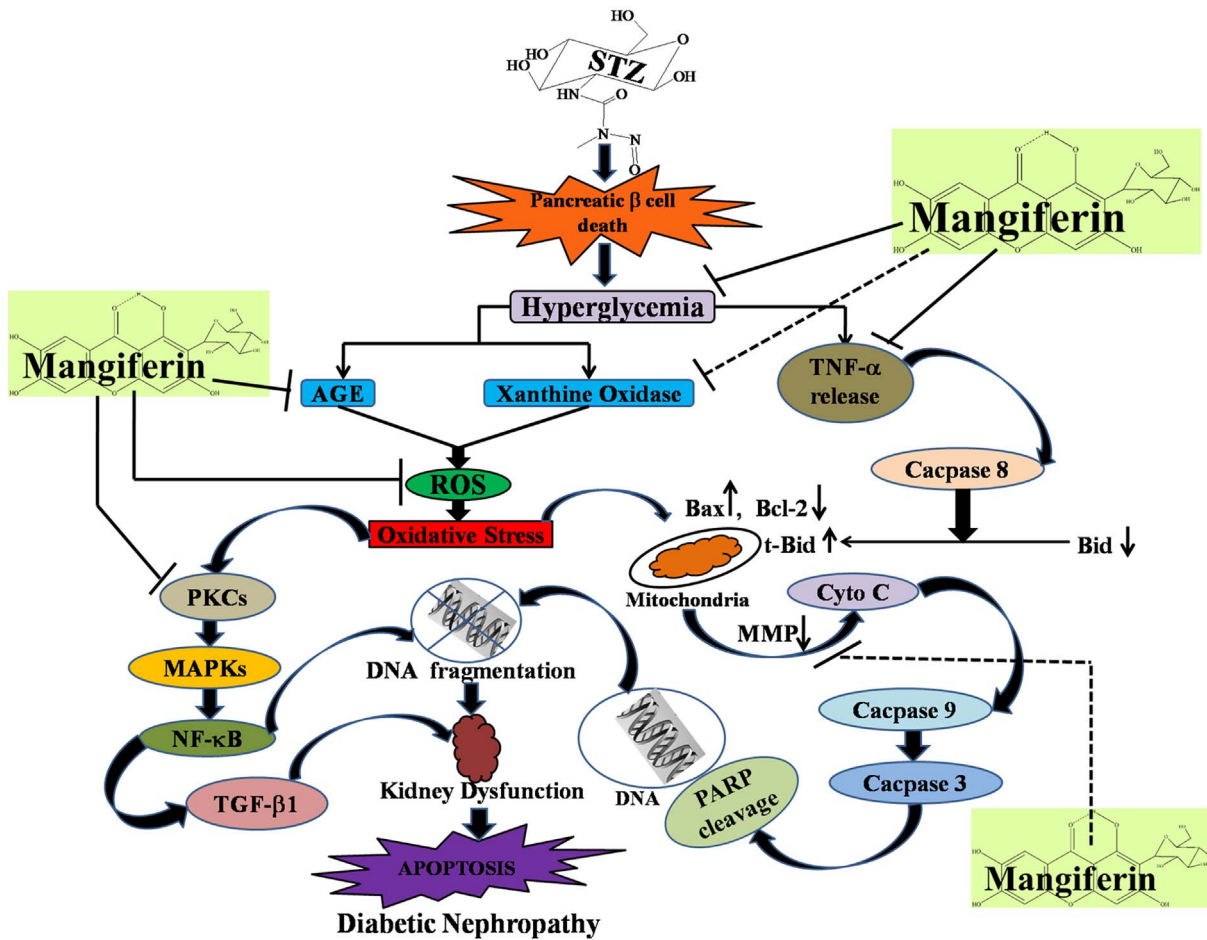

**Figure 15. Schematic representation of STZ induced diabetic nephropathy and its protection by mangiferin.**  
doi:10.1371/journal.pone.0107220.g015

## Reference

1. Pal PB, Sinha K, Sil PC (2014) Mangiferin Attenuates Diabetic Nephropathy by Inhibiting Oxidative Stress Mediated Signaling Cascade, TNF $\alpha$  Related and Mitochondrial Dependent Apoptotic Pathways in Streptozotocin-Induced Diabetic Rats. PLoS ONE 9(9): e107220. doi:10.1371/journal.pone.0107220
